# Supplementary material
Source: publisher figshare collection journal article supplement (https://tandf.figshare.com/articles/dataset/_/3382093)
Supplement: Supplementary file 1 [file 1]

Table A1

| Author                                 | Scenario                                                                | Expected uncertainty                                                                                |
|----------------------------------------|-------------------------------------------------------------------------|-----------------------------------------------------------------------------------------------------|
| Bertrand-Krajewski <i>et al.</i> 2000a | D=1000mm<br>Different equations for flow                                | > 40% for $h/D < 0.05$<br>$\pm 18\%$ for $h/D > 0.25$ (Cont)<br>$\pm 15\%$ for $h/D > 0.25$ (GMS)   |
| Bertrand-Krajewski <i>et al.</i> 2000b | Common situations in France                                             | $\pm 50\%$ to $\pm 100\%$                                                                           |
| USBR 2001                              | Good installation conditions<br>Appropriate maintenance and calibration | $\pm 10\%$                                                                                          |
| WAPUG 2002                             | Modelling                                                               | Dry weather: [-10%, +10%] in V and Qp<br>Wet weather: [-10%, +20%] in V<br>[-15%, +25%] in Qp       |
| Harmel <i>et al.</i> 2006              | Small streams<br>Different quality control procedures                   | Best-case scenario: $\pm 3\%$<br>Typical scenarios: 6 up to 19 %<br>Worst case scenario: $\pm 42\%$ |
| Ribeiro <i>et al.</i> 2009             | Circa 2301/s                                                            | 6.5% - 11%                                                                                          |
| Legend:                                | D: diameter<br>h/D: relative water depth<br>V: volume                   | Qp: peak flow<br>Cont: continuity equation<br>GMS: Gauckler-Manning-Strickler equation              |

Table A2

| Site                     | Year | RMSEP <sub>rel</sub> for variable <i>p</i> |                  |                           |                         |        |
|--------------------------|------|--------------------------------------------|------------------|---------------------------|-------------------------|--------|
|                          |      | 1 day                                      | 2 days           | 3 days                    | 4 days                  | 5 days |
| Q03                      | 2006 | 8,5%                                       | 8,6%             | 8,3%                      | 7,8%                    | 7,8%   |
|                          | 2007 | 9,0%                                       | 7,9%             | 7,8%                      | 7,3%                    | 8,9%   |
| Q08                      | 2006 | 9,9%                                       | 10,4%            | 9,7%                      | 10,0%                   | 10,1%  |
|                          | 2007 | 5,5%                                       | 6,2%             | 5,4%                      | 6,4%                    | 6,7%   |
| Q41                      | 2006 | 22,6%                                      | 22,5%            | 22,4%                     | 26,8%                   | 22,5%  |
|                          | 2007 | 10,8%                                      | 10,5%            | 9,7%                      | 16,5%                   | 16,4%  |
| Legend:<br>(see Table 1) |      | Very Good<br>0% - 5%                       | Good<br>5% - 10% | Satisfactory<br>10% - 20% | Unsatisfactory<br>> 20% |        |

Table A3

| Site                     | Year | RMSEP <sub>rel</sub> for variable <i>p</i> |                  |                           |                         |         |         |
|--------------------------|------|--------------------------------------------|------------------|---------------------------|-------------------------|---------|---------|
|                          |      | 1 hour                                     | 2 hours          | 3 hours                   | 4 hours                 | 5 hours | 6 hours |
| Q03                      | 2006 | 12,2%                                      | 11,5%            | <b>11,3%</b>              | 11,5%                   | 11,5%   | 11,6%   |
|                          | 2007 | 13,4%                                      | <b>12,1%</b>     | 12,1%                     | 12,3%                   | 12,6%   | 12,9%   |
| Q08                      | 2006 | 12,6%                                      | 9,6%             | <b>9,0%</b>               | 9,0%                    | 9,1%    | 9,1%    |
|                          | 2007 | 13,7%                                      | 9,7%             | <b>9,4%</b>               | 9,4%                    | 9,4%    | 9,7%    |
| Q41                      | 2006 | 12,5%                                      | <b>12,2%</b>     | 12,3%                     | 12,5%                   | 12,4%   | 12,5%   |
|                          | 2007 | 11,5%                                      | <b>10,2%</b>     | 10,3%                     | 10,8%                   | 10,5%   | 10,6%   |
| Legend:<br>(see Table 1) |      | Very Good<br>0% - 5%                       | Good<br>5% - 10% | Satisfactory<br>10% - 20% | Unsatisfactory<br>> 20% |         |         |
