# Supplementary material
Source: publisher figshare collection journal article supplement (https://tandf.figshare.com/articles/dataset/_/3382093)

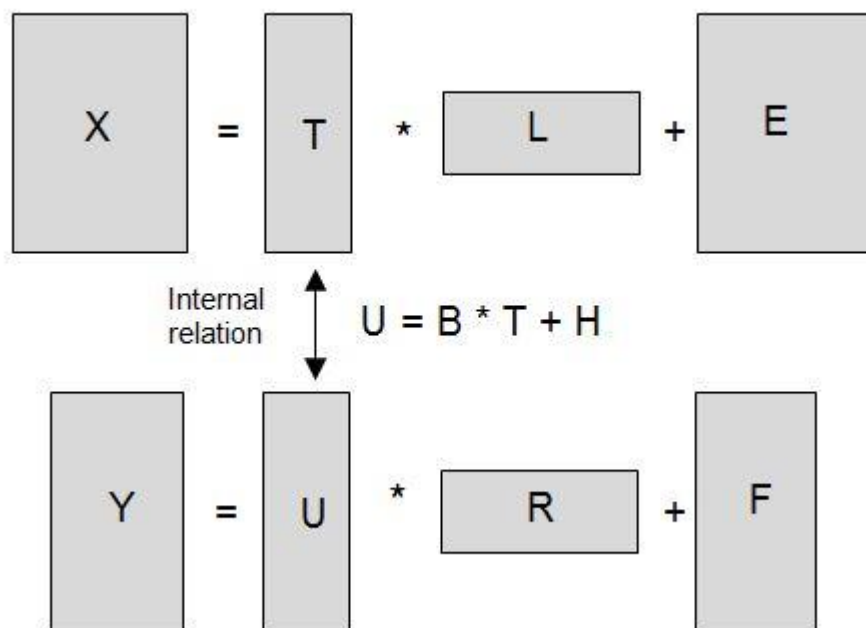

Figure A1

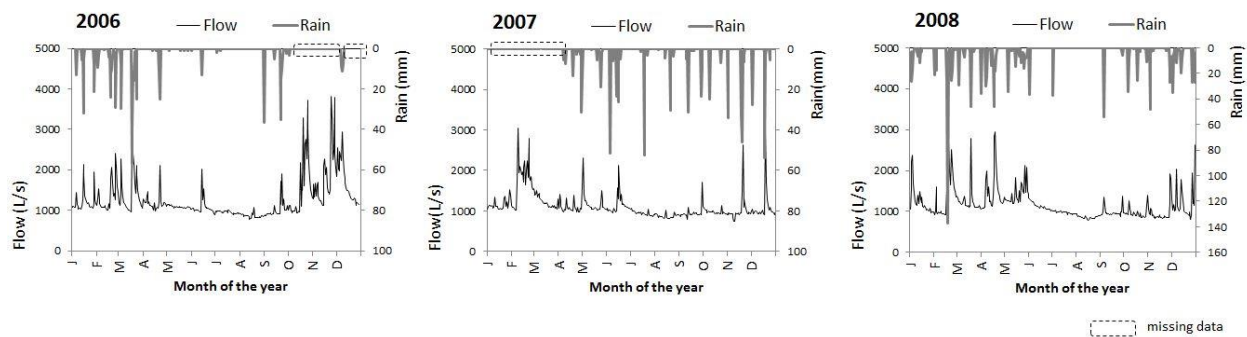

Figure A2

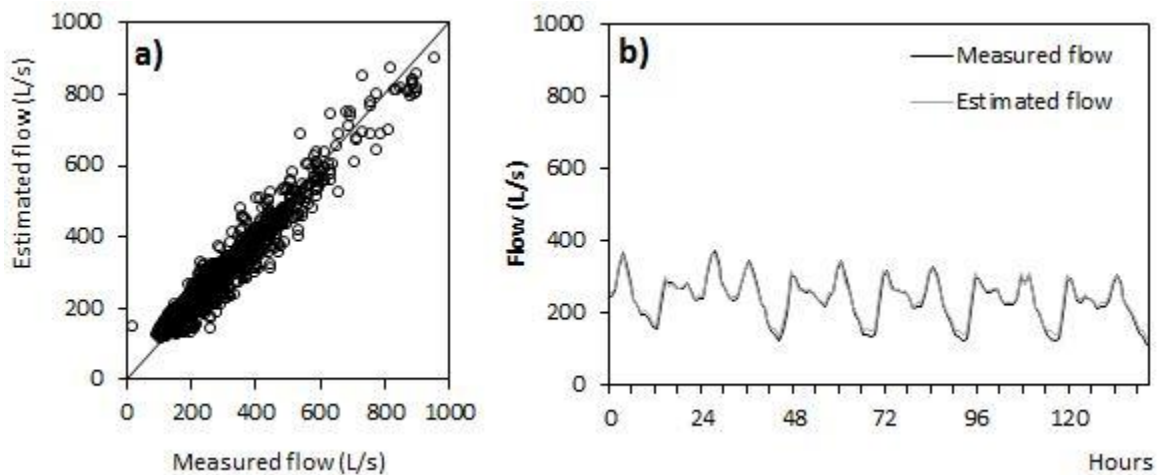

Figure A3ab

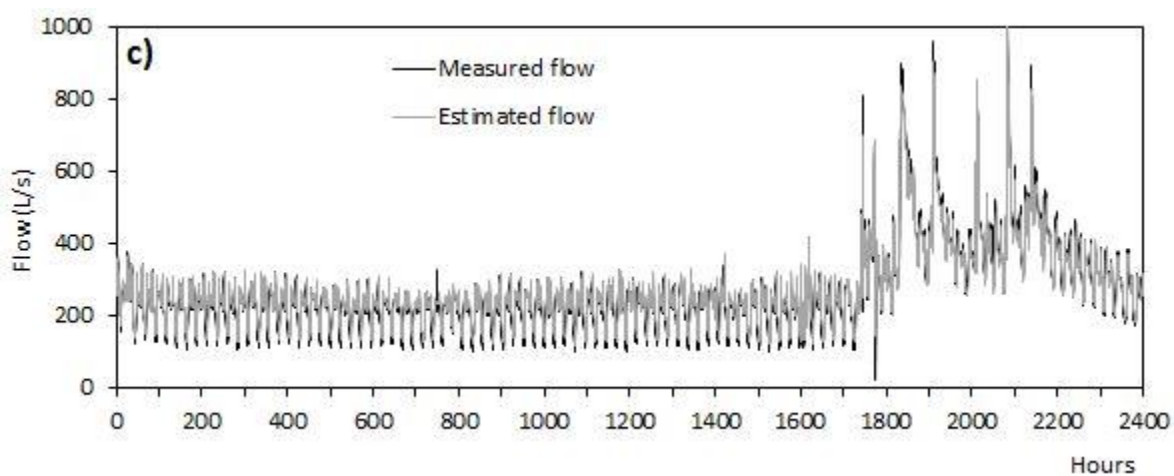

Figure A3c

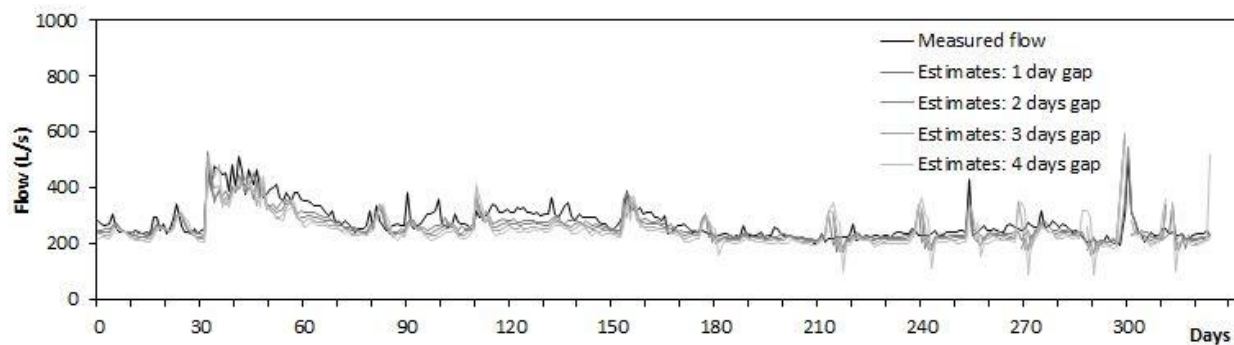

Figure A4

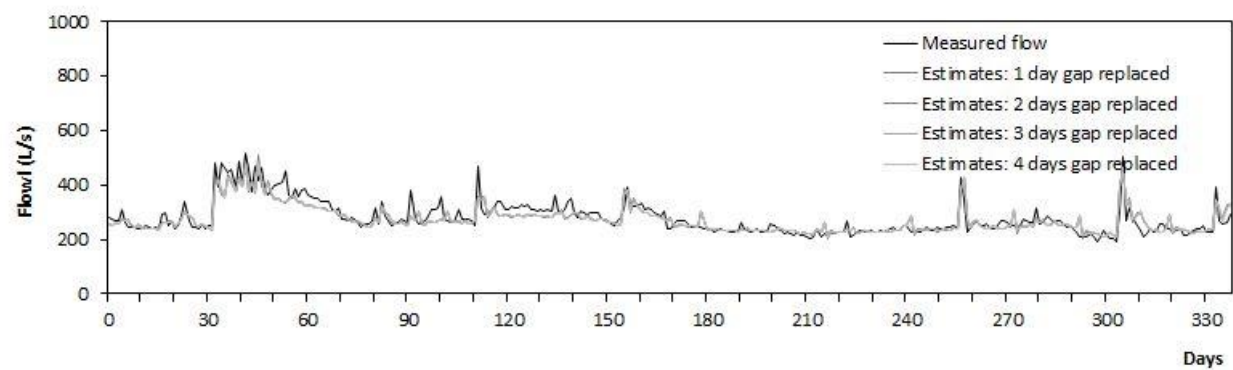

Figure A5

Supplement: Supplementary file 2 [file 1]
